# Supplementary material
Source: PubMed Central journal article supplement (PMC5079447)
Supplement: NIHMS788479-supplement-01.pdf [file NIHMS788479-supplement-01.pdf]

**Video Legend**

Video. Video clips of the case's laryngoscopic examinations performed in various deep brain stimulation (DBS) conditions. A) Pre-optimization, bilateral DBS ON; B) Pre-optimization, bilateral DBS OFF; C) Pre-optimization, left GPi DBS ON, right suboptimal STN DBS OFF; D) Post-optimization, bilateral DBS ON.
